# Supplementary material
Source: HighWire-hosted journal article supplement (https://www.cmaj.ca/highwire/filestream/147722/field_highwire_adjunct_files/0/220990-five-1-at.pdf)
Supplement: 220990-five-1-at.pdf [file 220990-five-1-at.pdf]

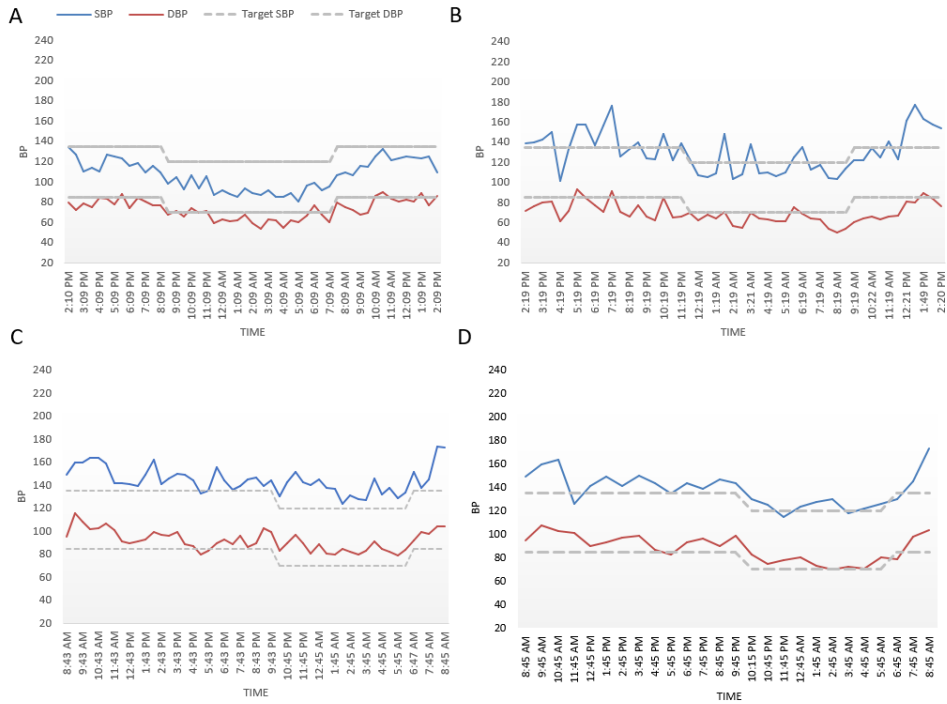

Figure 1. Ambulatory blood pressure patterns. A) Normal blood pressure during awake and sleep periods, B) High blood pressure variability, C) Sustained hypertension without nocturnal dipping, D) Sustained hypertension with nocturnal dipping

\*Blood pressure variability is defined by standard deviation (> 10 mmHg), coefficient of variation, or the average real variability.
